# Supplementary material for: Direct structural analysis of a single acyl carrier protein domain in fatty acid synthase from the fungus Saccharomyces cerevisiae
Source: PubMed Central journal article supplement (PMC10786820; doi:10.1038/s42003-024-05777-7), 2024-01-12
Supplement: 42003_2024_5777_MOESM1_ESM.pdf [file 42003_2024_5777_MOESM1_ESM.pdf]

# Direct Structural Analysis of a Single Acyl Carrier Protein Domain in Fatty Acid Synthase from the Fungus *Saccharomyces cerevisiae*

Elnaz Khalili Samani<sup>1</sup>, Amy C. Chen<sup>1</sup>, Jennifer W. Lou<sup>1</sup>, David L. Dai<sup>1</sup>, Alexander F.A. Keszei<sup>1,2</sup>, Guihong Tan<sup>3</sup>, Charles Boone<sup>3,4</sup>, Martin Grininger<sup>5</sup>, Mohammad T. Mazhab-Jafari<sup>1,2\*</sup>

<sup>1</sup>Department of Medical Biophysics, University of Toronto,

<sup>2</sup>Princess Margaret Cancer Center, University Health Network, Toronto, Ontario, Canada.

<sup>3</sup>Donnelly Centre, Toronto, ON, Canada.

<sup>4</sup>Department of Molecular Genetics, University of Toronto, Toronto, ON, Canada.

<sup>5</sup>Institute of Organic Chemistry and Chemical Biology, Buchmann Institute for Molecular Life Sciences, Goethe University, Frankfurt, Germany.

\*Correspondence: [mohammad.mazhabjafari@utoronto.ca](mailto:mohammad.mazhabjafari@utoronto.ca)

## Supplementary Information:

Tables..... pages 2-4

Figures.....pages 5-9

Supplementary References.....page 10

**Supplementary tables:**

**Supplementary Table 1.** Overview of five protein preparations used in this study.

| Protein Prep No. | Transformation Plasmid                                                                        | Expression Yeast Strain                      | Purification Method                                                                   | Polypeptides of Purified Protein                                                                                              | Hypothesis Tested (True or False)                                                                                                                                                                                     |
|------------------|-----------------------------------------------------------------------------------------------|----------------------------------------------|---------------------------------------------------------------------------------------|-------------------------------------------------------------------------------------------------------------------------------|-----------------------------------------------------------------------------------------------------------------------------------------------------------------------------------------------------------------------|
| Prep 1           | Fused <i>FAS1-FAS2</i> <sup>a</sup>                                                           | W303- <i>FAS1-3xFLAG</i> <sup>b</sup>        | anti-flag affinity liquid chromatography and size exclusion chromatography            | Mixture of fused and endogenous <i>FAS</i> polypeptides                                                                       | A fused <i>FAS1-FAS2</i> heteropolymer can be integrated into <i>FAS</i> protein assembly composed of native <i>FAS1</i> and <i>FAS2</i> polypeptides.                                                                |
| Prep 2           | MBP-fused <i>FAS1-FAS2-10xHis</i> (N-terminus MBP tag)                                        | BY.PK1238_ <i>FAS1-FAS2-dKO</i> <sup>c</sup> | Ni- NTA affinity liquid chromatography followed by size exclusion chromatography      | Fused <i>FAS1-FAS2</i> polypeptide with a MBP tag at the N-terminus of Beta chain                                             | <i>FAS</i> protein assembly can be tagged with MBP domain at the N-terminus of <i>FAS1-FAS2</i> heteropolymer with minimal structural perturbation.                                                                   |
| Prep 3           | Rtor-MBP-fused- <i>FAS1-FAS2-10xHis</i>                                                       | BY.PK1238_ <i>FAS1-FAS2-dKO</i> <sup>c</sup> | Ni- NTA affinity liquid chromatography followed by size exclusion chromatography      | Fused <i>FAS1-FAS2</i> polypeptide with the MBP tag at the gene splitting site of the Beta chain                              | <i>FAS</i> protein assembly can be tagged with MBP domain between the ER and DH domains of <i>FAS1-FAS2</i> heteropolymer with minimal structural perturbation.                                                       |
| Prep 4           | Rtor-MBP-fused- <i>FAS1-FAS2-10xHis</i> MF639K1_ <i>FAS1-StrepII</i> MF319d_ <i>FAS2-ΔACP</i> | BY.PK1238_ <i>FAS1-FAS2-dKO</i> <sup>c</sup> | Ni- NTA affinity liquid chromatography Followed by strep-tactin liquid chromatography | Fused <i>FAS1-FAS2</i> protein with the MBP tag at the gene splitting site of the Beta chain mixed with endogenous <i>FAS</i> | Distribution of an ACP domain can be determined from a <i>FAS</i> protein with mixed polypeptides containing native <i>FAS1</i> and <i>FAS2</i> <sup>(ΔACP)</sup> and MBP-tagged <i>FAS1-FAS2</i> heteropolymer.      |
| Prep 5           | Rtor-MBP-fused- <i>FAS1-FAS2-10xHisΔACP</i> MF639K1_ <i>FAS1-StrepII</i> MF319d_ <i>FAS2</i>  | BY.PK1238_ <i>FAS1-FAS2-dKO</i> <sup>c</sup> | Ni- NTA affinity liquid chromatography Followed by strep-tactin liquid chromatography | Fused <i>FAS1-FAS2</i> protein with the MBP tag at the gene splitting site of the Beta chain mixed with endogenous <i>FAS</i> | Distribution of five ACP domains can be determined from a <i>FAS</i> protein with mixed polypeptides containing native <i>FAS1</i> and <i>FAS2</i> , and MBP-tagged <i>FAS1-FAS2</i> <sup>(ΔACP)</sup> heteropolymer. |

a from<sup>1</sup>

b from<sup>2</sup>

c from<sup>3</sup>

**Supplementary Table 2.** *S. cerevisiae* strains used in this study as expression system.

| Name                                 | Description                                               | Genotype                                                                                              |
|--------------------------------------|-----------------------------------------------------------|-------------------------------------------------------------------------------------------------------|
| W303-FAS1-3xFLAG <sup>a</sup>        | 3xFLAG cloned at <i>FAS1</i> C-terminus                   | MATa/MATα {leu2-3,112 trp1-1 can1-100 ura3-1 ade2-1 his3-11,15} [phi <sup>+</sup> ] FAS1::3xFlag-URA3 |
| BY.PK1238_FAS1-FAS2-dKO <sup>b</sup> | FAS1 and FAS2 reading frames replaced with KanMX cassette | Mata; his3Δ0 leu2Δ0 ura3Δ0 TRP1 lys2D0 MET15 fas1::uptag-kanMX4-downtag fas2::uptag-kanMX4-downtag    |

a From <sup>2</sup>

b From <sup>3</sup>

**Supplementary Table 3.** Plasmid constructs used in this study.

| Name                                       | Background | Description                                                                                                                                                                           |
|--------------------------------------------|------------|---------------------------------------------------------------------------------------------------------------------------------------------------------------------------------------|
| Fused <i>FAS1-FAS2</i> <sup>a</sup>        | pRS313     | <i>FAS1-FAS2</i> fusion, AmpR resistance, Histidine auxotroph                                                                                                                         |
| MBP-fused <i>FAS1-FAS2-10xHis</i>          | pRS313     | <i>FAS1-FAS2</i> fusion gene with N-terminus MBP tag and C-terminus 10xHis tag, AmpR resistant, Uracil auxotroph                                                                      |
| Rtor-MBP-fused- <i>FAS1-FAS2-10xHis</i>    | pRS313     | <i>FAS1-FAS2</i> fusion gene with MBP inserted in interface between <i>R. toruloides FAS1</i> and <i>FAS2</i> genes and 8 aa linker, AmpR resistant, Uracil auxotroph                 |
| Rtor-MBPΔACP-fused <i>FAS1-FAS2-10xHis</i> | pRS313     | <i>FAS1-FAS2</i> fusion gene with MBP inserted in interface between <i>R. toruloides FAS1</i> and <i>FAS2</i> genes and 8 aa linker and ACP deleted, AmpR resistant, Uracil auxotroph |
| MF319d_ <i>FAS2</i>                        | pRS313     | <i>S. cerevisiae FAS2</i> gene, HIS3 marker                                                                                                                                           |

|                              |        |                                                                         |
|------------------------------|--------|-------------------------------------------------------------------------|
| MF639K1_FAS1-<br>StrepII     | pRS313 | <i>S. cerevisiae</i> FAS1 gene with C-terminus strepII tag, LEU2 marker |
| MF319d_FAS2-<br>$\Delta$ ACP | pRS313 | <i>S. cerevisiae</i> FAS2 gene, HIS3 marker with ACP deleted            |

a From <sup>1</sup>

## Supplementary Figures:

A

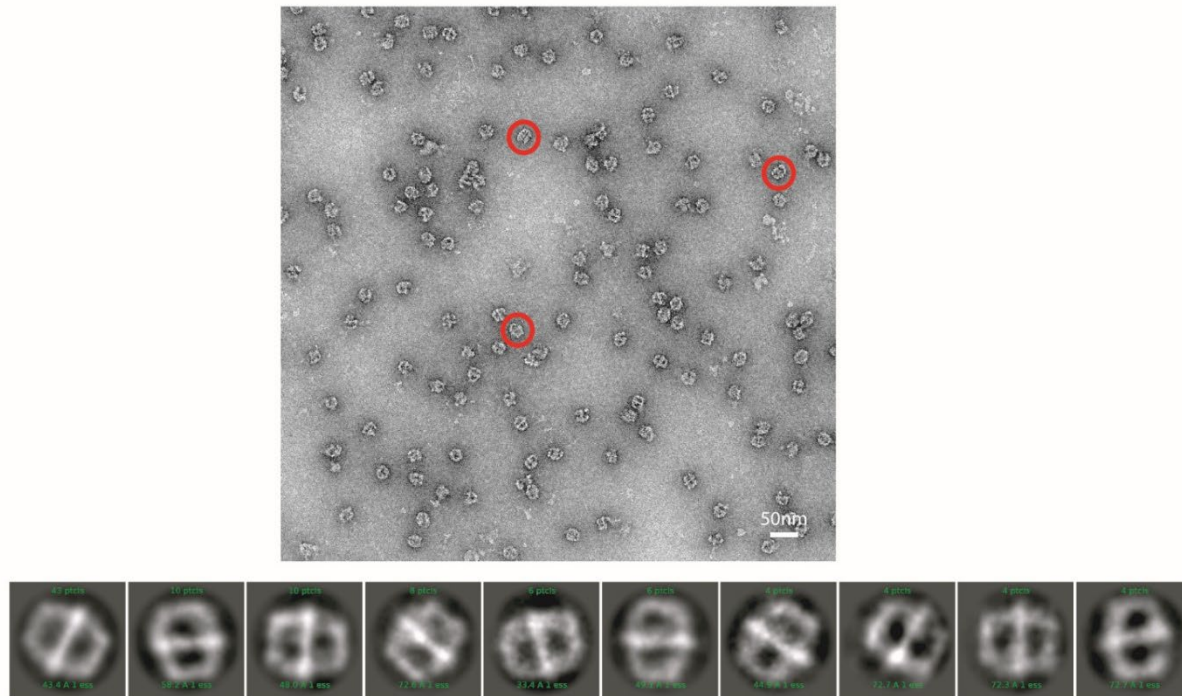

B

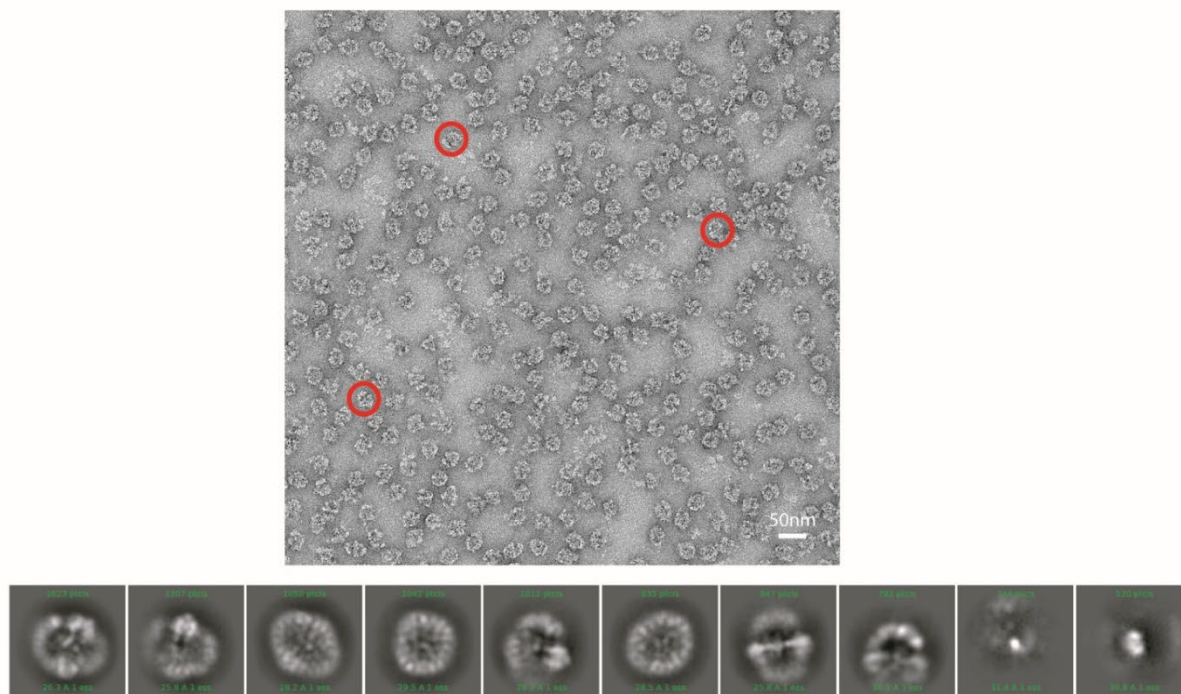

**Supplementary figure 1. Insertion of six MBP tag on *S. cerevisiae* FAS destabilizes the structure.** Representative negative stained electron micrographs and reference free 2D classes are shown for **A)** *fusFAS* and **B)** *fusFAS<sup>N-MBP</sup>* (*i.e.*, prep 2).

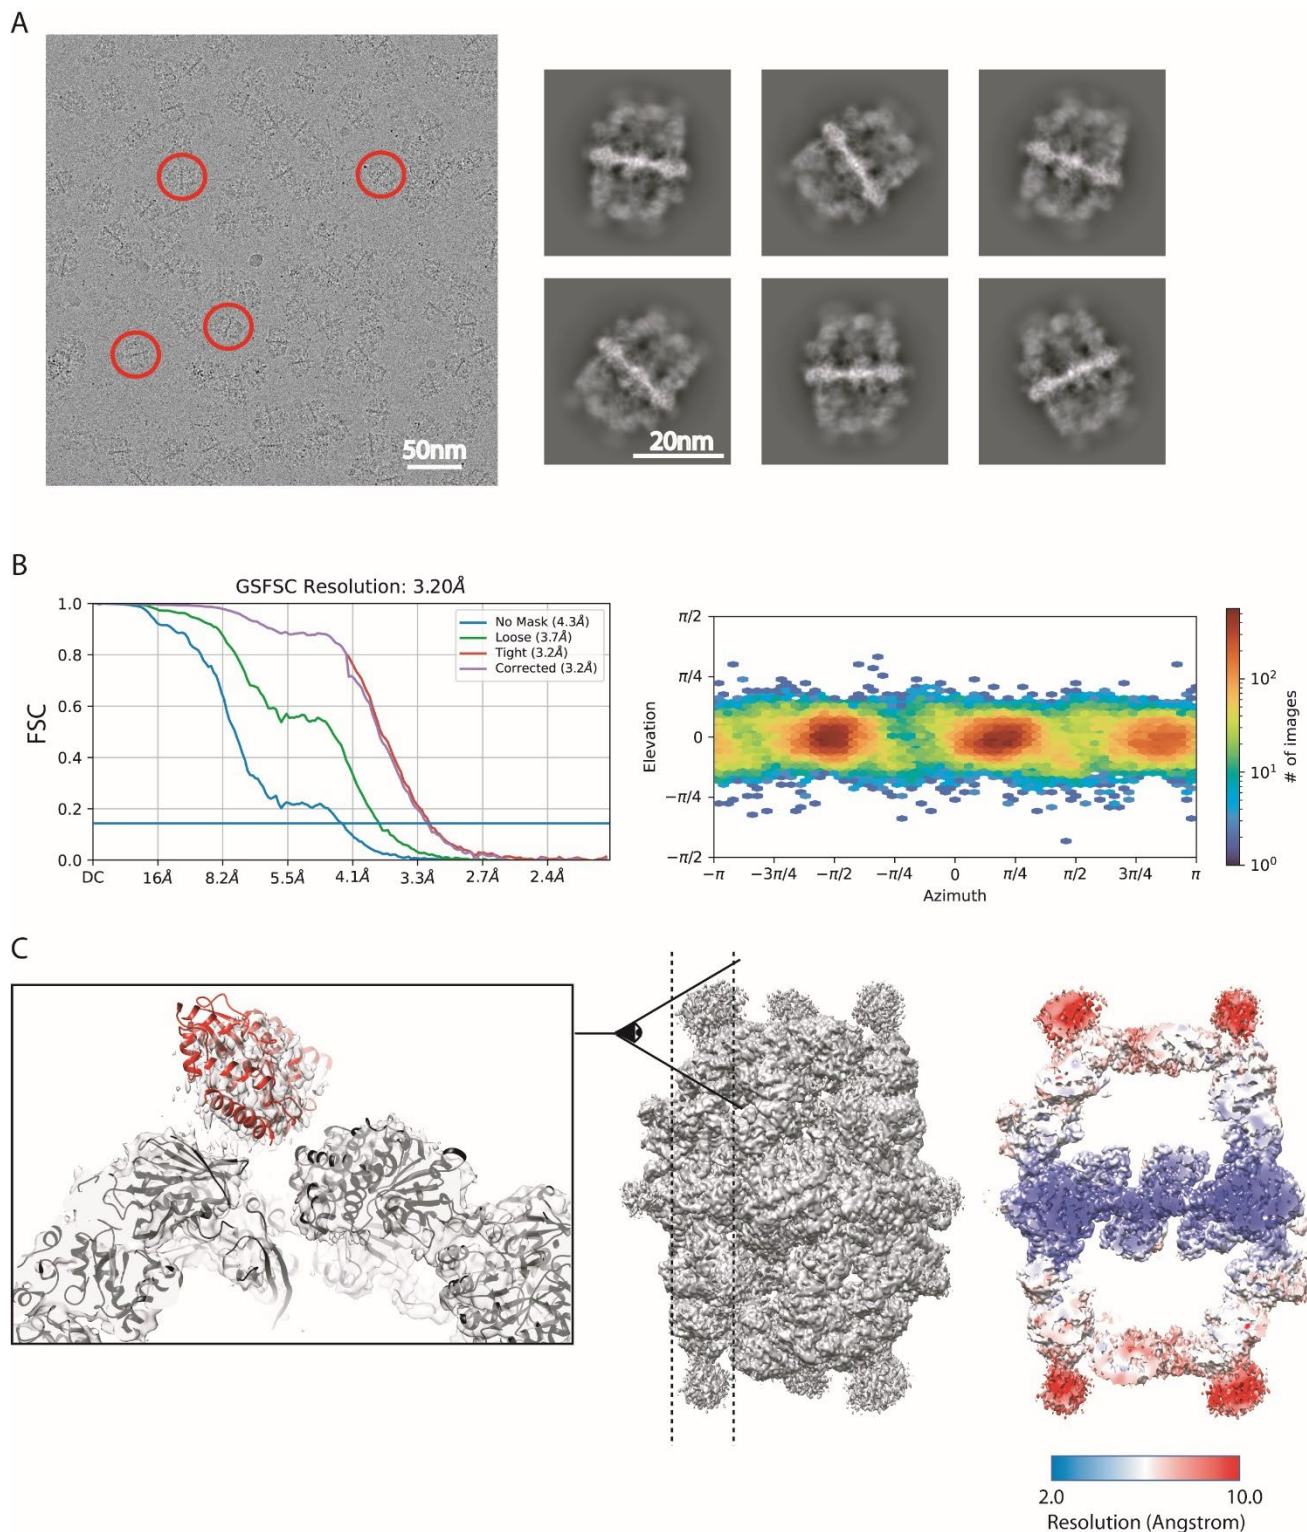

**Supplementary figure 2. cryoEM reconstruction of prep 3 (i.e.,  $6 \times \text{fusFAS}^{\text{Rtor-MBP}}$  chain. **A**) a representative cryoEM micrograph of purified protein with example of reference free 2D classes. **B**) Gold standard FSC curves and orientation distribution of a consensus 3D refinement with no symmetry imposed. **C**) cryoEM 3D reconstruction is shown in the center with model to map fit of the apical region shown in the inset. A slice of local resolution estimate is shown to the right.**

fusFAS<sup>Rtor-MBP</sup> + FAS1 + FAS2<sup>ΔACP</sup>

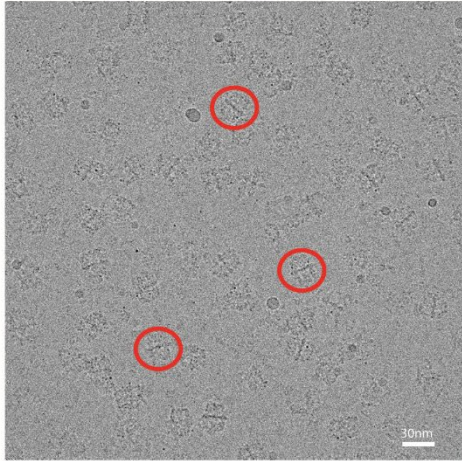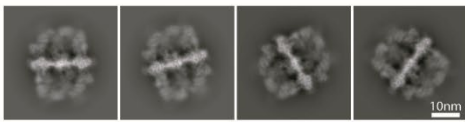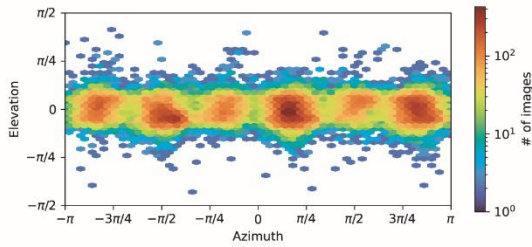

ΔACP-fusFAS<sup>Rtor-MBP</sup> + FAS1 + FAS2

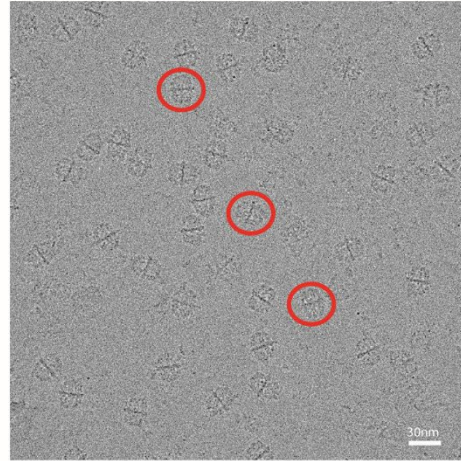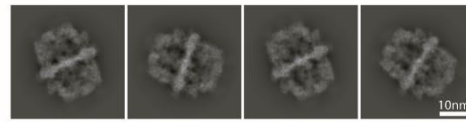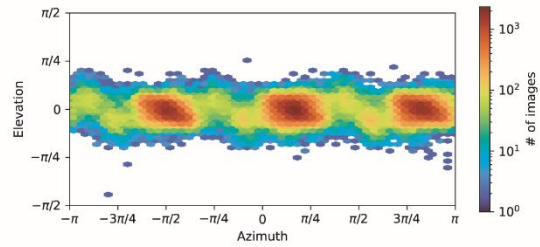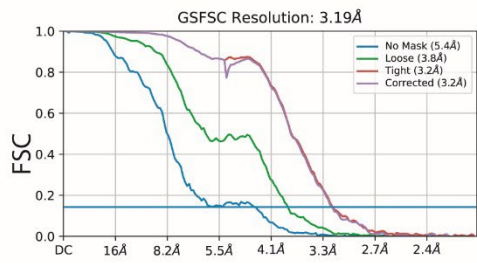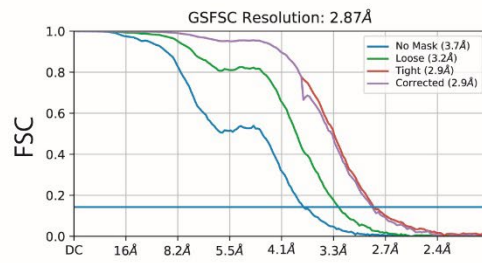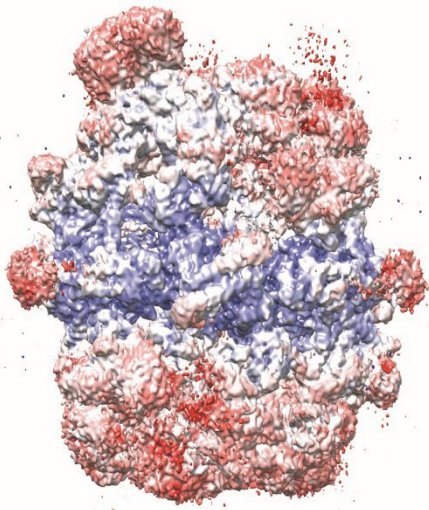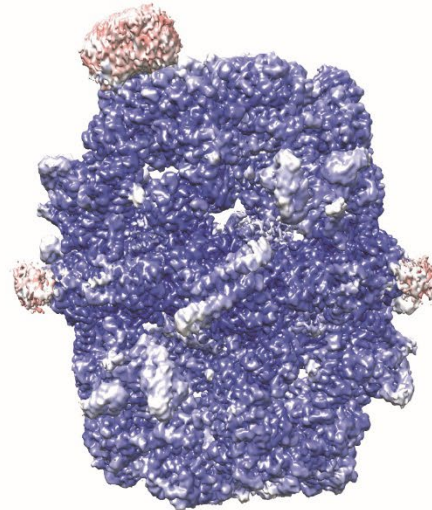

2.0 10.0  
Resolution (Angstrom)

**Supplementary Figure 3. cryoEM analysis of asymmetric FAS.** Representative cryoEM micrographs, reference free 2D classes, FSC curves, particle image orientation distribution, and 3D reconstructions colored via local resolution estimate are shown for each asymmetric FAS sample. Prep 4 and 5 are presented in the left and right columns, respectively.

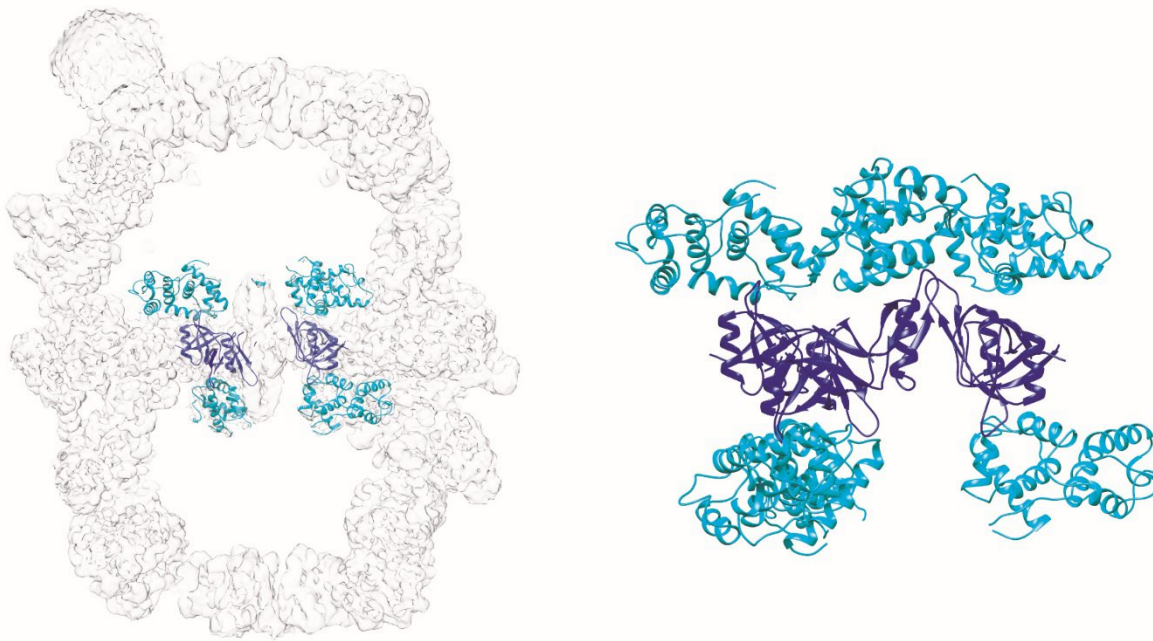

**Supplementary figure 4. cryoEM density quantification of atomic models of ACP and KS domains.** Atomic models of ACP domains (residues 141-302) and portions of KS domains (residue 1120-1179) are shown as cyan and dark blue respectively, fitted into the cryoEM map of asymmetric FAS from prep 5 shown as transparent white. Same fitting was done for cryoEM map of asymmetric FAS from prep 4. Zoomed in view of atomic models used in quantification is shown in the right panel.



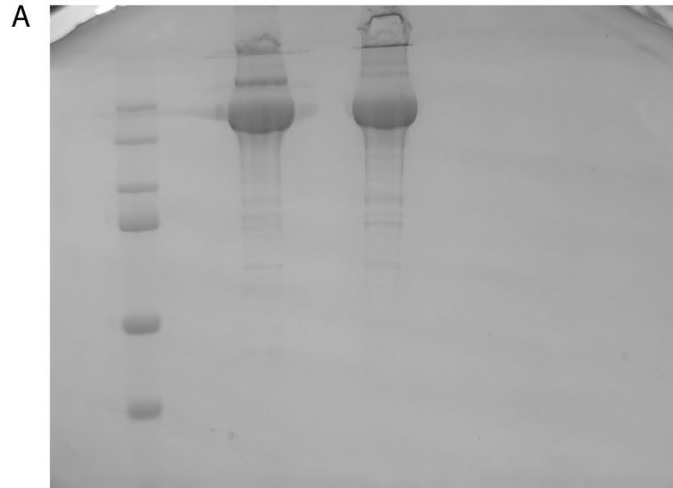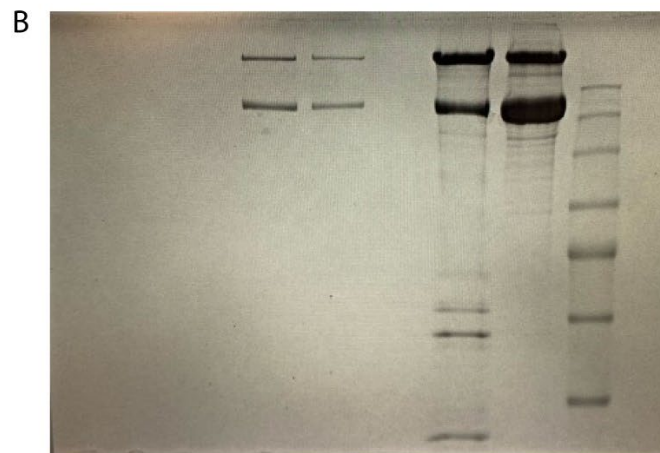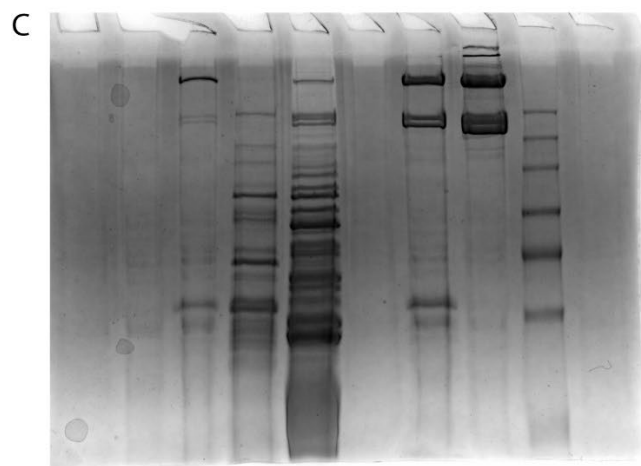

**Supplementary figure 5. SDS-PAGE analysis of purified proteins.** Uncropped and unedited images of SDS-PAGE analysis of proteins in this study. Panels A), B), and C) are from figure 2B, 3C, and 3D, respectively.

### Supplementary References:

1. Wernig, F., Born, S., Boles, E., Grininger, M. & Oreb, M. Fusing  $\alpha$  and  $\beta$  subunits of the fungal fatty acid synthase leads to improved production of fatty acids. *Sci Rep* **10**, (2020).
2. Lou, J. W., Iyer, K. R., Hasan, S. M. N., Cowen, L. E. & Mazhab-Jafari, M. T. Electron cryomicroscopy observation of acyl carrier protein translocation in type I fungal fatty acid synthase. *Sci Rep* **9**, 12987 (2019).
3. Gajewski, J., Pavlovic, R., Fischer, M., Boles, E. & Grininger, M. ARTICLE Engineering fungal de novo fatty acid synthesis for short chain fatty acid production. (2017)  
doi:10.1038/ncomms14650.
