# Supplementary material for: Direct structural analysis of a single acyl carrier protein domain in fatty acid synthase from the fungus Saccharomyces cerevisiae
Source: PubMed Central journal article supplement (PMC10786820; doi:10.1038/s42003-024-05777-7), 2024-01-12
Supplement: 42003_2024_5777_MOESM2_ESM.pdf [file 42003_2024_5777_MOESM2_ESM.pdf]

## **Description of Additional Supplementary Files**

**File name:** Supplementary Data 1

**Description:** The source data behind the box plot in figure 5A.

**File name:** Supplementary Data 2

**Description:** The source data behind the box plot in figure 5B.
